# Supplementary material for: Effect of acute TLR4 inhibition on insulin resistance in humans
Source: JCI journal article supplement (doi:10.1172/jci162291), 2022-09-06
Supplement: sd1 [file 1]

# **Effect of acute TLR4 inhibition on insulin resistance in human subjects**

Hanyu Liang, Nattapol Sathavarodom, Claudia Colmenares,

Jonathan Gelfond, Sara Espinoza, Vinutha Ganapathy, Nicolas Musi

## **SUPPLEMENTARY MATERIALS**

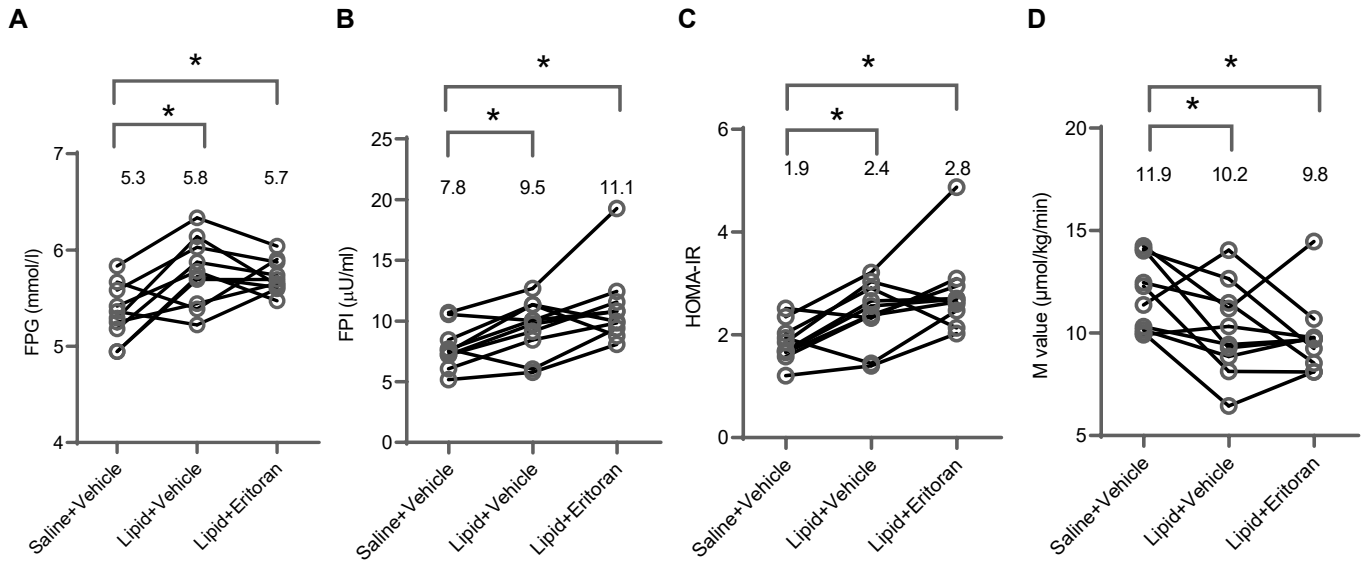

**Figure S1. Effect of lipid and eritoran on metabolic parameters in lean subjects.** Fasting blood glucose (FPG) (A), fasting plasma insulin (FPI) (B), HOMA insulin resistance index (HOMA-IR) (C), and insulin-stimulated glucose metabolism (M values) (D) were determined following saline+vehicle, lipid+vehicle, and lipid+eritoran infusions.  $n=10$ . Mean values of each group are shown above individual data points. Data were compared using one-way ANOVA followed by Holm-Šidák's multiple comparisons test. \*  $P < 0.05$ .

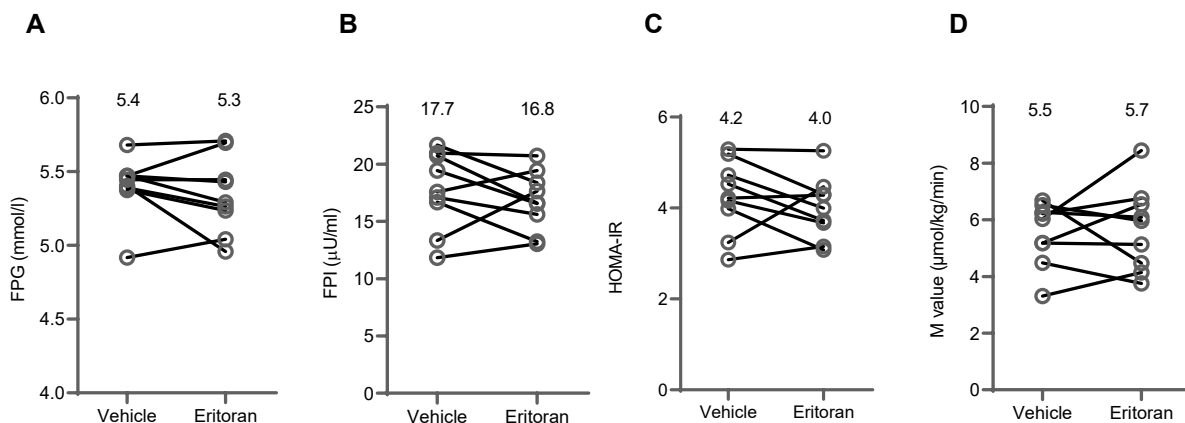

**Figure S2. Effect of eritoran on metabolic parameters in obese subjects.** Fasting blood glucose (FPG) (A), fasting plasma insulin (FPI) (B), HOMA insulin resistance index (HOMA-IR) (C), and insulin-stimulated glucose metabolism (M values) (D) were determined following vehicle or eritoran administration. n=9. Mean values of each group are shown above individual data points. Comparisons were made using paired t-tests or Wilcoxon signed-ranked test.

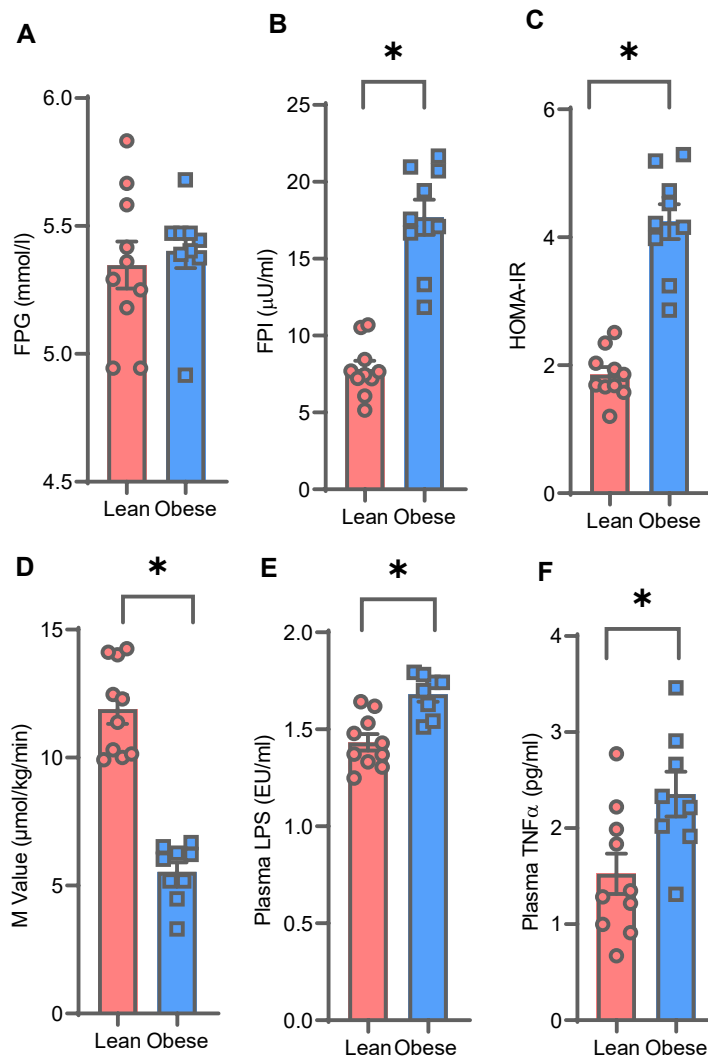

**Figure S3. Comparison of metabolic parameters in lean and obese subjects.** FPG (A), FPI (B), HOMA-IR (C), M value (D), plasma LPS (E) and TNF $\alpha$  levels (F) were determined in lean and obese subjects, following saline+vehicle (Protocol I) and vehicle administration (Protocol II), respectively. All data are the mean  $\pm$  SEM of data obtained from 10 lean and 9 obese subjects. FPG: Fasting plasma glucose; FPI: fasting plasma insulin; M value: insulin-stimulated glucose metabolism; Data were compared using an unpaired t-test. \*  $P < 0.05$ .

**Table S1. Plasma glucose, insulin and FFA concentrations before and during the insulin clamp – Protocol I**

| <b>Parameters</b>                                |              | <b>Saline+Vehicle</b> | <b>Lipid+Vehicle</b> | <b>Lipid+Eritoran</b> |
|--------------------------------------------------|--------------|-----------------------|----------------------|-----------------------|
| <b>FFA<br/>(<math>\mu\text{mol/l}</math>)</b>    | <b>Basal</b> | 513 $\pm$ 65          | 481 $\pm$ 47         | 537 $\pm$ 26          |
|                                                  | <b>Clamp</b> | 52 $\pm$ 11           | 157 $\pm$ 36*        | 138 $\pm$ 8*          |
| <b>Insulin<br/>(<math>\mu\text{U/ml}</math>)</b> | <b>Basal</b> | 7.8 $\pm$ 0.5         | 9.5 $\pm$ 0.7*       | 11.1 $\pm$ 1.0*       |
|                                                  | <b>Clamp</b> | 183.1 $\pm$ 10.5      | 178 $\pm$ 9.3        | 180.4 $\pm$ 9.1       |
| <b>Glucose<br/>(<math>\text{mmol/l}</math>)</b>  | <b>Basal</b> | 5.3 $\pm$ 0.1         | 5.8 $\pm$ 0.1*       | 5.7 $\pm$ 0.1*        |
|                                                  | <b>Clamp</b> | 5.5 $\pm$ 0.1         | 5.5 $\pm$ 0.1        | 5.4 $\pm$ 0.1         |

All values are mean  $\pm$  SEM. n=10. \*  $P < 0.05$  compared to saline+vehicle. Comparisons made with repeated measures ANOVA followed by Holm-Šídák's multiple comparisons test.

**Table S2. Plasma glucose, insulin and FFA concentrations before and during the insulin clamp – Protocol II**

| <b>Parameters</b>                                |              | <b>Vehicle</b>   | <b>Eritoran</b>  |
|--------------------------------------------------|--------------|------------------|------------------|
| <b>FFA<br/>(<math>\mu\text{mol/l}</math>)</b>    | <b>Basal</b> | $536 \pm 35$     | $605 \pm 78$     |
|                                                  | <b>Clamp</b> | $48 \pm 7$       | $52 \pm 7$       |
| <b>Insulin<br/>(<math>\mu\text{U/ml}</math>)</b> | <b>Basal</b> | $17.7 \pm 1.1$   | $16.8 \pm 0.9$   |
|                                                  | <b>Clamp</b> | $239.2 \pm 16.8$ | $252.8 \pm 14.2$ |
| <b>Glucose<br/>(<math>\text{mmol/l}</math>)</b>  | <b>Basal</b> | $5.4 \pm 0.1$    | $5.3 \pm 0.1$    |
|                                                  | <b>Clamp</b> | $5.4 \pm 0.0$    | $5.5 \pm 0.1$    |

All values are mean  $\pm$  SEM. n=9. Treatments compared with a paired t-test.
